# Supplementary material for: A STD-NMR Study of the Interaction of the Anabaena Ferredoxin-NADP+ Reductase with the Coenzyme
Source: MDPI journal article supplement (doi:10.3390/molecules19010672), 2014-01-07

## Supplementary Materials

**Figure S1.** FNR-NAD STD experiment (top), on-resonance (middle) and off-resonance (bottom).

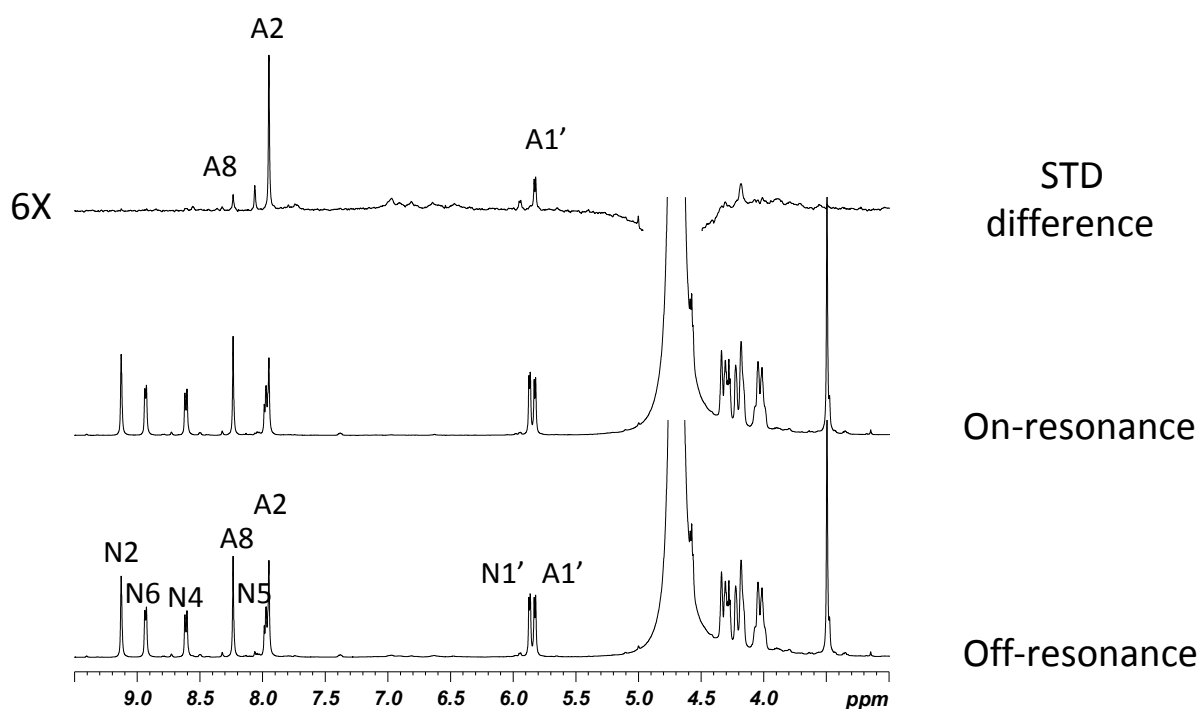

**Figure S2.** FNR-NADP STD experiment (top), on-resonance (middle) and off-resonance (bottom).

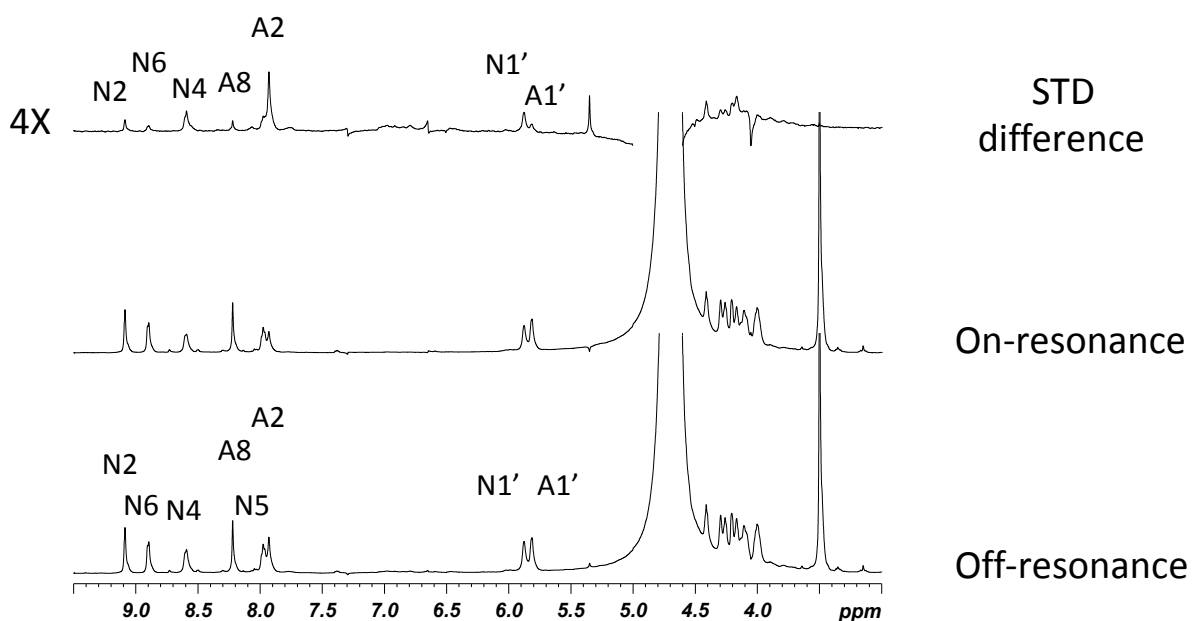

Supplement: s1 [file s1]
